# Supplementary material for: Overexpression of LjPLT3 Enhances Salt Tolerance in Lotus japonicus
Source: MDPI journal article supplement (doi:10.3390/ijms24065149), 2023-03-08
Supplement: s1 [file s1]

**Table S1** Primers used in this study.

| Genes                                                             | Forward primer (5'-3')        | Reverse primer (5'-3')        |
|-------------------------------------------------------------------|-------------------------------|-------------------------------|
| <b>Primers used for gene cloning</b>                              |                               |                               |
| <i>LjPLT3-OE</i>                                                  | GGTACCTGTCTACTCAAGAAAAACAACCC | GGATCCAGGCTTCACTAGTTTGCACCTCA |
| <i>pLjPLT3:GUS</i>                                                | AACTGCAGCAACAATAAATTCATCACTAG | CGGAATTCTATCCTGCTTGTATGATTGAA |
| <b>Primers used for quantitative real-time analysis (qRT-PCR)</b> |                               |                               |
| <i>LjPLT3</i>                                                     | CGTCACTATTATATCTGCCATATTCGG   | CACTTTCTCGCCTCGCCTACG         |
| <i>LjCAT</i>                                                      | GCGCCTGACAGGCAAGATA           | TGCCCAAGAGAACGATCAGC          |
| <i>LjSOD</i>                                                      | TGAACAATGGTGAAGGCTGTG         | CCTTGACATTATCGCTGCTGC         |
| <i>LjAPX</i>                                                      | CCAACCCTCACATCTTCGACA         | ACCTTCCTTCTACCGGTCAA          |
| <i>LjGR</i>                                                       | CGTGGTTGTGTTCCCAAAAAGA        | GCATCCTGAAGTTCACCACCAT        |
| <i>LjACTIN</i>                                                    | TGTGCGGAGGTACTTGGGCTTAAGA     | CTTCCCAGGCAAATGCCAACACTAG     |

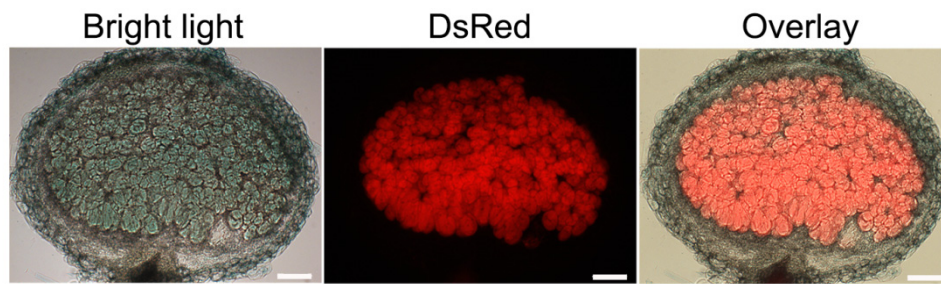

**Figure S1.** GUS staining of *pLjPLT3: GUS* plant. Cross-section of a nodule from a *pLjPLT3: GUS* plant showing GUS activity overlapped with bacterioids carrying *DsRED* in the infection zone. Three-day-old plants were inoculated with *M. loti* expressing *DsRed* and six nodules were collected for section four weeks later after infection. Scale bar=50  $\mu$ m

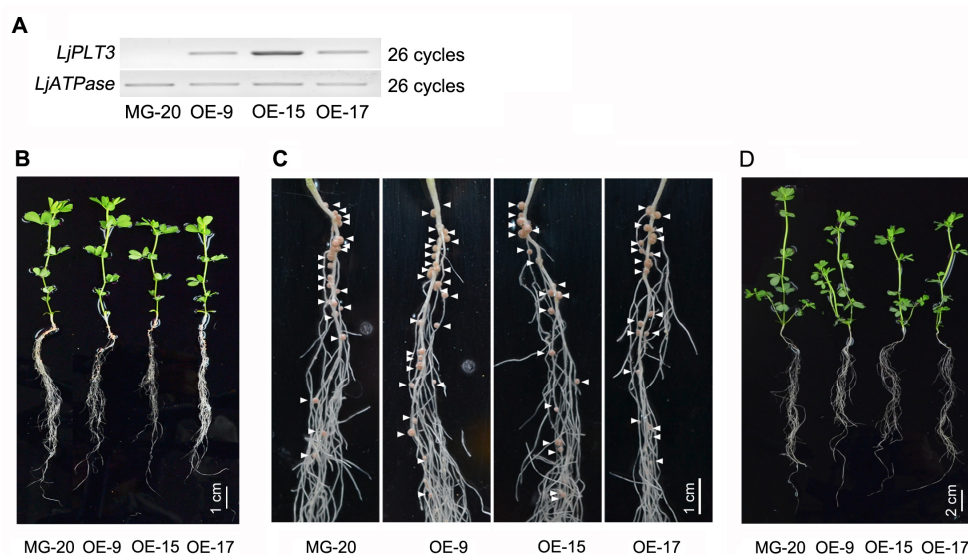

**Figure S2.** Phenotype of *OEPLT3* plants. (A) The expression level of *LjPLT3* gene in transgenic plants. (B) Four-week-old plants in symbiotic condition. (C) Nodules on the roots of transgenic plants and the wildtype. Three-old-day seedlings were inoculated with *M. loti* and representative plants were chosen for photograph four weeks later in (B) and (C). (D) Four-week-old plants in nitrogen-sufficient condition. 3-day-old seedlings were irrigated with Hoagland's solution once a week and representative plants were chosen for photograph four weeks later.
